# Supplementary material for: Paxillus involutus-Facilitated Cd2+ Influx through Plasma Membrane Ca2+-Permeable Channels Is Stimulated by H2O2 and H+-ATPase in Ectomycorrhizal Populus × canescens under Cadmium Stress
Source: PubMed Central journal article supplement (PMC5216326; doi:10.3389/fpls.2016.01975), 2017-01-06
Supplement: Table_1.pdf [file Table_1.pdf]

**Supplemental TABLE S1. Effects of  $\text{Ca}^{2+}$  concentrations on sensitivity of  $\text{Cd}^{2+}$ -selective microelectrodes.**

| Unit: mM         | $-\text{Ca}^{2+}$                  | $+\text{Ca}^{2+}$ |              |              |              |              |              |              |              | $+\text{K}^{+}+\text{Ca}^{2+}+\text{Mg}^{2+}$                         |
|------------------|------------------------------------|-------------------|--------------|--------------|--------------|--------------|--------------|--------------|--------------|-----------------------------------------------------------------------|
|                  | $\text{Cd}^{2+}$ (0.01, 0.05, 0.1) | 0.01              | 0.025        | 0.05         | 0.1          | 0.2          | 0.5          | 1.0          | 2.0          | $\text{K}^{+}$ (0.1)/ $\text{Ca}^{2+}$ (0.05)/ $\text{Mg}^{2+}$ (0.1) |
| Nernst Slope     | 34.0476                            | 25.1954           | 26.4443      | 28.9053      | 28.4665      | 28.6798      | 27.1430      | 26.9611      | 27.0076      | 29.0247                                                               |
|                  | $\pm 0.5584$                       | $\pm 0.4619$      | $\pm 0.2704$ | $\pm 0.3568$ | $\pm 0.5725$ | $\pm 0.8838$ | $\pm 0.3648$ | $\pm 0.3496$ | $\pm 0.4301$ | $\pm 0.9358$                                                          |
| Nernst Intercept | 247.4408                           | 239.5143          | 239.6579     | 241.8781     | 237.6448     | 238.7986     | 227.3050     | 221.8072     | 216.1608     | 243.1562                                                              |
|                  | $\pm 1.4602$                       | $\pm 1.5502$      | $\pm 1.4003$ | $\pm 0.9108$ | $\pm 1.5195$ | $\pm 1.8944$ | $\pm 1.2770$ | $\pm 1.0566$ | $\pm 0.9820$ | $\pm 1.2556$                                                          |

$\text{Cd}^{2+}$ -selective microelectrodes were calibrated in  $\text{Cd}^{2+}$  solutions (0.01, 0.05, 0.1 mM) supplemented with or without 0, 0.01, 0.025, 0.05, 0.1, 0.2, 0.5, 1.0, and 2.0 mM  $\text{Ca}^{2+}$ . In addition, the Nernst slope and intercept of the  $\text{Cd}^{2+}$  electrodes was calibrated in the measuring solution containing 0.1 mM KCl, 0.1 mM  $\text{MgCl}_2$ , and 0.05 mM  $\text{CaCl}_2$ .
